# Supplementary material
Source: PubMed Central journal article supplement (PMC9540352)
Supplement: NIHMS1840386-supplement-Weitz_et_al__appendix.pdf [file NIHMS1840386-supplement-Weitz_et_al__appendix.pdf]

## Supplementary Appendix

This appendix has been provided by the authors to give readers additional information about their work.

Supplement to: Weitz JI, Strony J, Ageno W, et al. Milvexian for the prevention of venous thromboembolism. N Engl J Med 2021;385:2161-72. DOI: 10.1056/NEJMoa2113194

## Table of contents

|                                                                                                  |    |
|--------------------------------------------------------------------------------------------------|----|
| Committees and investigators .....                                                               | 1  |
| Operations Committee (OC).....                                                                   | 1  |
| Steering Committee (SC) .....                                                                    | 1  |
| Investigators.....                                                                               | 2  |
| Acknowledgements.....                                                                            | 3  |
| Outcome definitions .....                                                                        | 4  |
| 1. Venous thromboembolism (VTE) .....                                                            | 4  |
| 1.1. Deep Vein Thrombosis (DVT) on the unilateral venography of the operated leg: .....          | 4  |
| 1.2. Suspected DVT of the leg.....                                                               | 4  |
| 1.3. Suspected Pulmonary Embolism (PE).....                                                      | 4  |
| 2. Bleeding events .....                                                                         | 5  |
| 3. Classification of cause of death.....                                                         | 5  |
| Per Protocol analysis.....                                                                       | 6  |
| Table S1 Per Protocol Analysis: Efficacy Outcomes.....                                           | 7  |
| Figure S1: Median hemoglobin values before and after surgery with milvexian and enoxaparin ..... | 8  |
| Figure S2 Mean prothrombin time ratios after surgery with milvexian and enoxaparin. ....         | 9  |
| Table S2 Adverse Events by system organ class with milvexian and Enoxaparin .....                | 10 |
| Table S3 Serious adverse events with milvexian and enoxaparin .....                              | 11 |

## **Committees and investigators**

### **Operations Committee (OC)**

Jeffrey Weitz, Chair

Michael Rud Lassen

Jack Lawrence

Kenneth Mahaffey

Robin Roberts

Dietmar Seiffert

Julia Lull (Independent statistician; non-voting)

### **Steering Committee (SC)**

Gary Raskob, Chair

Walter Ageno

David Gailani

Elaine Hylek

Danshi Li

John Strony

Javad Parvizi

## Investigators

Countries that enrolled patients are listed alphabetically, and the names of investigators and their affiliations are provided. The numbers in parentheses reflect the numbers of patients enrolled.

*Argentina* – R. Ahuad Guerrero (8) (Sanatorio Corporación Médica de General San Martín), L. Cartasegna (10) (Hospital Italiano de La Plata), M. Casas (12) (Clínica Adventista Belgrano), F. Ferré (14) (Clínica Chutro), L. Parody (2) (Hospital San Roque), M. Rasmussen (1) (Instituto de Investigaciones Clínicas Rosario).

*Belgium* – A. Borms (22) (ZNA Jan Palfijn), G. De Wachter (14) (Jessa Ziekenhuis), P. Mertens (11) (ZNA Middelheim), R. Witvrouw (2) (Ziekenhuis Oost-Limburg).

*Brazil* – R. Araujo (6) (Hospital Sao Francisco de Assis), N. Ono (2) (Hospital Estadual Mario covas).

*Bulgaria* – G. Dimitrov (2) (University Multiprofile Hospital for Active Treatment Dr. Georgi Stranski), P. Kinov (29) (University multiprofile hospital for active treatment" Tsaritsa Yoanna – ISUL), V. Proichev (33) (Multiprofile hospital for active treatment - Medical complex Sveti Ivan Rilski), V. Yablanski, (13) (Acibadem City Clinic multiprofile hospital for active treatment Tokuda)

*Canada* – F. Abuzgaya (5) (Lakeridge Health).

*Greece* – G. Babis (37) (General Hospital of Nea Ionia 'Konstantopoulio'), G. Macheras (28) (General Hospital of Attiki 'KAT'), E. Tsiridis (12) (Papageorgiou General Hospital), M. Tyllianakis (4) (University General Hospital of Rio Patras).

*Hungary* – L. Bucsi (20) (Fejér Megyei Szent György Egyetemi Oktató Kórház), Z. Csernátóny (25) (Debreceni Egyetem), T. Gunther (2) (Petz Aladár Egyetemi Oktató Kórház), G. Janositz (5) (Bács-Kiskun Megyei Oktatókórház), L. Sámson (28) (MÁV Kórház és Rendelőintézet), G. Sohár (12) (Szegedi Tudományegyetem), I. Szabó (8) (Somogy Megyei Kaposi Mór Oktató Kórház), Gy. Szőke (7) (Simmelweis Egyetem).

*Israel* – B. Bernfeld (5) (Carmel Medical Center), Y. Brin (10) (Meir Medical Center), Y. Kosashvili (42) (Kaplan Medical Center), D. Norman (2) (Rambam Medical Center).

*Italy* – A. Angeloni (5) (Azienda Ospedaliera Papa Giovanni XXIII), M. Berardino (1) (A.O.U. Città della Salute e della Scienza), C. Lodigiani (2) (Istituto Clinico Humanitas), F. Verde (2) (Cliniche Humanitas Gavazzeni).

*Japan* – T. Kasai (8) (Chubu Rosai Hospital), T. Kawamoto (20) (Matsudo City General Hospital), S. Kim (5) (Juntendo University Nerima Hospital), T. Kodama (7) (Japan Community Health Care Organization Saitama Medical Center), K. Mitsui (7) (Nagano Prefectural Shinshu Medical Center), S. Mori (17) (Yuuai Medical Center), M. Nagao (4) (Juntendo University Hospital), T. Nakai (6) (Itami City Hospital), M. Nawata (18) (Marunouchi Hospital), S. Nuka (5) (Hakodate Goryokaku Hospital), H. Ogihara (5) (Japanese Red Cross Hamamatsu Hospital), K. Okamura (2) (Yonemori Hospital), K. Okuma (10) (Saitama City Hospital), N. Shiota (20) (National Hospital Organization Okayama Medical Center).

*Poland* – A. Atras (8) (Oddział Urazowo-Ortopedyczny Wojewodzki Szpital Specjalistyczny), S. Dragan (36) (Uniwersytecki Szpital Kliniczny im. Jana Mikulicza-Radeckiego we Wrocławiu), G. Kwiatkowski (80) (Oddział Ortopedii i Traumatologii Narządu Ruchu Szpital Specjalistyczny im. Ludwika Rydygiera), A. Madej (2) (Wojewodzki Szpital Zespolony w Kielcach, Klinika Chirurgii Ortopedyczno-Urazowej), P. Skowronek (3) (Oddział Chirurgii Urazowej i Ortopedycznej, Wojewodzki Szpital Brodnowski, SPZOZ), G. Sterkowicz (28) (Oddział Ortopedii Specjalistyczny Szpital im. E. Szczeklika), M. Synder (46) (CSK UM Klinika Ortopedii), S. Wysocki (14) (Szpital Ogólny im. W. Gineła, Oddział Urazowo-Ortopedyczny).

*Portugal* – M.D. Silva (1) (Hosp. de Cascais), J. Brenha (75) (Centro Hospitalar do Baixo Vouga - Hospital Infante Dom Pedro), C. Varino (3) (ULSAM, EPE - Hospital de Santa Luzia).

*Russia* – O. Chegurov (7) (National Medical Research Center of Traumatology and Orthopaedics n.a. G.A. Ilizarov), I. Ezhov (4) (Privolzhsky Regional Medical Center of Federal Medical and Biological Agency), M. Fedunencko (6) (Sochi City Hospital #4), N. Kornilov (1) (National medical research center of Traumatology and Orthopaedics n.a. R.R.Vreden), V. Popov (2) (Private Healthcare Institution 'Clinical Hospital 'RZD-Medicine' n.a. N.A.Semashko').

*Spain* – E. Castellet Feliú (21) (Hosp. Univ. Vall D Hebron), A. Delgado Martinez (10) (Complejo Hospitalario De Jaen), E. Gómez-Barrena (3) (Hosp. Univ. La Paz), J. Hernández (2) (Hosp. Univ. Germans Trias I Pujol), J. Martínez Martín (12) (Hosp. Univ. Fundacion Alcorcon), G. Oliver (23) (Hosp. Univ De Bellvitge), L. Peidro (6) (Complejo Hospitalario De Jaen), J. Sanchez (4) (Corporacio Sanitari Parc Tauli), A. Silvestre (6) (Hosp. Clinico Univ. De Valencia).

*Turkey* – H. Cicek (2) (Adana City Hospital), T. Eren (2) (Şişli Etfal Research Training Hospital), F. Guler (1) (Antalya Training And Research Hospital), O. Ersan (18) (Dışkapı Yıldırım Beyazid Training and Research Hospital).

*Ukraine* – V. Filipenko (19) (Institute of Spine and Joint Pathology named after Prof.Sytenko of National Academy of Medical Sciences), O. Khvysyuk (15) (Municipal Institution of Health Care 'Kharkiv Regional Clinical Traumatology Hospital'), V. Maiko (11) (Vinnytsya Regional Clinical Hospital named after M.I.Pirogov), T. Petryk (19) (Kyiv Regional Clinical Hospital), A. Pidlisetskyk (9) (Communal Institution of Lviv Regional Council 'Lypa Lviv Regional Hospital'), O. Polivoda (2) (Municipal Non-profit Enterprise 'Odesa Regional Clinical Hospital' Odesa Regional Council), V. Sulyma (9) (Ivano-Frankivsk Regional Clinical Hospital).

*United States of America* – R. Berkowitz (20) (University Orthopedic and Joint Replacement Center), R. Browne (15) (Central Research Associates, Inc.), W. Cottrell (2) (DMI Research), J. Gimbel (2) (Arizona Research Center), L. Kwong (5) (Lundquist Institute for Biomedical Innovation at Harbor-UCLA Medical Center), J. Schwappach (53) (Denver Metro Orthopedics, PC), E. Stolarski (48) (Gulfoast Research Institute), I. Wiener (10) (Memorial Hermann Memorial City Medical Center).

## **Acknowledgements**

We thank Dr. Paul Sidhu for providing venography training, Wentao Lu for providing statistical support, Esther Lee for operational support, and Vidya Perera for pharmacokinetic analyses. Dr. Weitz holds the Canada Research Chair (Tier I) in Thrombosis and the Heart and Stroke Foundation J. F. Mustard Chair in Cardiovascular Research at McMaster University.

# Outcome definitions

## 1. Venous thromboembolism (VTE)

### 1.1. Deep Vein Thrombosis (DVT) on the unilateral venography of the operated leg:

The diagnostic criteria for DVT will be a constant intraluminal filling defect of the same shape on two different images, or non-visualization of vein(s) in the presence of a sudden cut-off, or multiple radiological signs on one image (at least 2 of the 3) of non-filling with expansion of vessel (tramlining), abrupt cut-off and non-visualization of a (part) of a vein and/or diversion of flow. On a cine loop sequence, (recording a real time image) with limb rotation a filling defect or abrupt vein cut-off in continuous profile will be diagnostic of a DVT.

The result of the adjudication will be:

- No Clot
- Distal Clot
- Proximal Clot
- Distal and Proximal clot
- Not Evaluable Distal but No Proximal Clot
- Not Evaluable

### 1.2. Suspected DVT of the leg

Symptomatic DVT of the leg will be confirmed if there are typical symptoms of thrombosis associated with:

- Non-compressible vein segment on ultrasonography (US) of the deep veins of the leg, or
- An intraluminal filling defect and/or non-visualization of veins in the presence of a sudden cutoff on ascending venography or an intraluminal filling defect on computed tomography (CT) venography, or magnetic resonance imaging (MRI) venography.

If there was a previous DVT of the leg, the confirmation will require symptoms of DVT, and:

- An extension of an intraluminal filling defect, a new intraluminal filling defect, or an extension of non-visualization of veins in the presence of a sudden cut-off on venography, CT-scan, or MRI venography, or
- A non-compressible vein segment on ultrasonography where compression had been normal or a substantial increase ( $\geq 4$  mm) in the diameter of the thrombus during full compression (if previously non-compressible), or a different clot location compared with the clot location detected on venography.

### 1.3. Suspected Pulmonary Embolism (PE)

Symptomatic PE will be confirmed if there are typical symptoms of PE associated with:

- An intraluminal filling defect in (sub) segmental or more proximal branches on spiral CT, or CT pulmonary angiogram;
- An intraluminal filling defect or a sudden cutoff of vessels (more than 2.5 mm in diameter) on a catheter guided pulmonary angiogram;
- A large perfusion defect ( $\sim 75\%$  of a segment) with a normal ventilation result (high probability) on perfusion ventilation lung scan (PLS, VLS or V/Q scan); or
- An intermediate probability V/Q lung scan complemented by ultrasound or venographic evidence of DVT

Diagnosis of fatal PE is based on one or more of the following:

- Objective diagnostic testing
- Autopsy

- Death which cannot be attributed to a documented cause and for which PE cannot be completely ruled out

## 2. Bleeding events

### Major Bleed

Since all patients will have had knee surgery, criteria for major bleeding in the surgical setting will be as described by Schulman et al. in JThromb Haemost 2010

- Fatal bleeding, and/or
- Bleeding that is symptomatic and occurs in a critical area or organ such as intracranial, intraspinal, intraocular, retroperitoneal, pericardial, in a non-operated joint, or intramuscular with compartment syndrome, and/or
- Extra surgical site bleeding causing a fall in hemoglobin (Hb) level of 2.0 g/dL (1.24 mmol/L) or more, or leading to transfusion of 2 or more units of whole blood or packed red blood cells, with temporal association within 24 to 48 hours to the bleeding, and/or
- Surgical site bleeding that requires a second intervention (open, arthroscopic, endovascular), or a hemarthrosis of sufficient size as to interfere with rehabilitation by delaying mobilization or delayed wound healing resulting in prolonged hospitalization or a deep wound infection, and/or
- Surgical site bleeding that is unexpected and prolonged and/or sufficiently large to cause hemodynamic instability. There should be an associated fall in Hb-level of 2.0 g/dL (1.24 mmol/L) or more, or transfusion, indicated by the bleeding, of at least 2 units of whole blood or packed red blood cells, with temporal association within 24 hours to the bleeding.

### Clinically relevant nonmajor bleed

Overt bleeding not meeting the criteria for major bleeding, but that resulted in, for example, medical examination, intervention or had clinical consequences for a patient, will be classified as clinically relevant nonmajor (CRNM) bleeding.

### Minor bleeding events

Overt bleeding events that do not fulfill the criteria for a major bleed or a clinically relevant nonmajor bleed will be classified as minor bleeds.

### Non-overt bleeding events

Suspected bleeding events (e.g., decline in Hb without unusual blood loss during the knee surgery, or isolated microscopic hematuria) will be classified as “no bleeding event.”

## 3. Classification of cause of death

Death will be classified in below categories with respect to cause:  
Cardiovascular (check one of the subcategories listed below)

- Myocardial Infarction
- Non-hemorrhagic Stroke
- Intracranial Hemorrhage
- Hemorrhage, not intracranial
- Congestive Heart Failure or Cardiogenic Shock
- Pulmonary Embolism
- Unknown but PE cannot be ruled out
- Other vascular (to be specified)

## Non-Cardiovascular

- Accidental/Trauma
- Respiratory Failure
- Malignancy
- Suicide
- Liver Failure
- Renal Failure
- Infection/Sepsis
- Other non-vascular (to be specified)

## Per Protocol analysis

Per protocol analysis set includes all mITT subjects with no key protocol deviations. Key protocol deviations are defined as follows:

- Developed withdrawal criteria but not withdrawn
- Randomized but did not satisfy key criteria
- Received a disallowed concomitant treatment
- Received study drug that is different from the treatment group randomized by the IWRS or an incorrect dose of study drug
- Was randomized but did not receive study drug



**Table S1 Per Protocol Analysis: Efficacy Outcomes**

| Outcome                                                | Milvexian Twice Daily |             |             |             | Milvexian Once Daily |             |             | Enoxaparin |
|--------------------------------------------------------|-----------------------|-------------|-------------|-------------|----------------------|-------------|-------------|------------|
|                                                        | 25 mg                 | 50 mg       | 100 mg      | 200 mg      | 25 mg                | 50 mg       | 200 mg      | 40 mg      |
| No. of patients evaluated                              | 125                   | 120         | 130         | 126         | 27                   | 124         | 115         | 245        |
| Primary efficacy outcome: total venous thromboembolism |                       |             |             |             |                      |             |             |            |
| Any event – no. (%)                                    | 26 (21)               | 14 (12)     | 12 (9)      | 10 (8)      | 6 (22)               | 30 (24)     | 8 (7)       | 54 (22.0)  |
| Relative risk milvexian vs. enoxaparin                 | 0.94                  | 0.52        | 0.42        | 0.37        | 0.87                 | 1.15        | 0.32        | NA         |
| (95% confidence Interval)                              | (0.62-1.40)           | (0.30-0.89) | (0.23-0.76) | (0.20-0.70) | (0.42-1.82)          | (0.78-1.69) | (0.16-0.64) | NA         |
| Components of the primary efficacy outcome – no. (%)   |                       |             |             |             |                      |             |             |            |
| Any death                                              | 0                     | 0           | 0           | 0           | 0                    | 0           | 0           | 1          |
| Nonfatal pulmonary embolism                            | 0                     | 1           | 1           | 0           | 0                    | 0           | 0           | 1          |
| Symptomatic distal deep-vein thrombosis                | 0                     | 0           | 1           | 0           | 0                    | 2           | 0           | 0          |
| Asymptomatic proximal deep-vein thrombosis             | 1                     | 0           | 1           | 0           | 0                    | 2           | 0           | 2          |
| Asymptomatic distal deep-vein thrombosis               | 25                    | 13          | 9           | 10          | 6                    | 26          | 8           | 50         |
| Extent of deep-vein thrombosis on venography – no.     |                       |             |             |             |                      |             |             |            |
| Confluent distal into proximal                         | 1                     | 0           | 1           | 0           | 0                    | 2           | 0           | 1          |
| Isolated proximal                                      |                       |             |             |             |                      |             |             |            |
| Large: ≥10 cm                                          | 0                     | 0           | 0           | 0           | 0                    | 0           | 0           | 0          |
| Small: <10 cm                                          | 0                     | 0           | 0           | 0           | 0                    | 0           | 0           | 1          |
| Isolated distal                                        |                       |             |             |             |                      |             |             |            |
| Extensive: ≥2 veins                                    | 9                     | 5           | 1           | 2           | 4                    | 9           | 1           | 20         |
| Limited: <2 veins                                      | 16                    | 8           | 9           | 8           | 2                    | 18          | 7           | 30         |

**Figure S1: Median hemoglobin values before and after surgery with milvexian and enoxaparin**

The middle line indicates the median, the top and bottom of the box indicate the upper and lower limits, respectively, of the interquartile range.

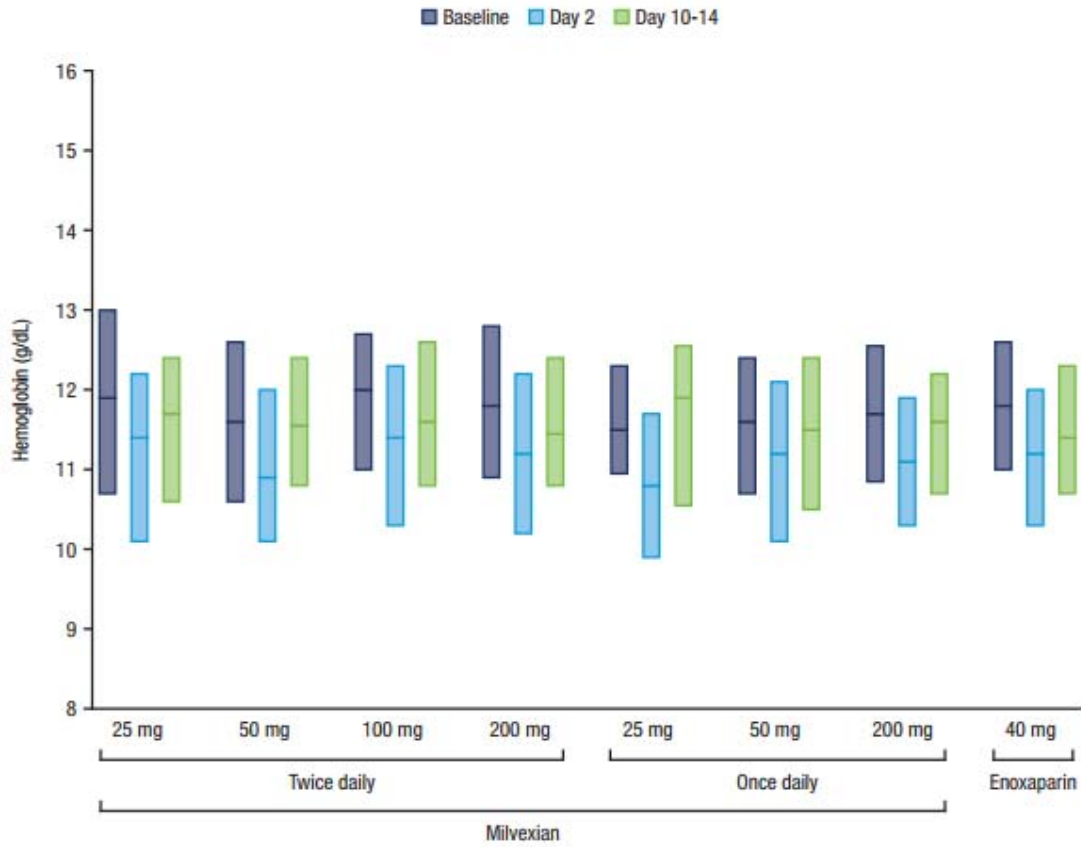

**Figure S2 Mean prothrombin time ratios after surgery with milvexian and enoxaparin.**

Prothrombin times measured after surgery on days 1, 4 and 10-14 were divided by baseline prothrombin times to calculate the prothrombin time ratios. The symbols indicate the means, whereas the bars above and below the symbols indicate the standard error of the mean.

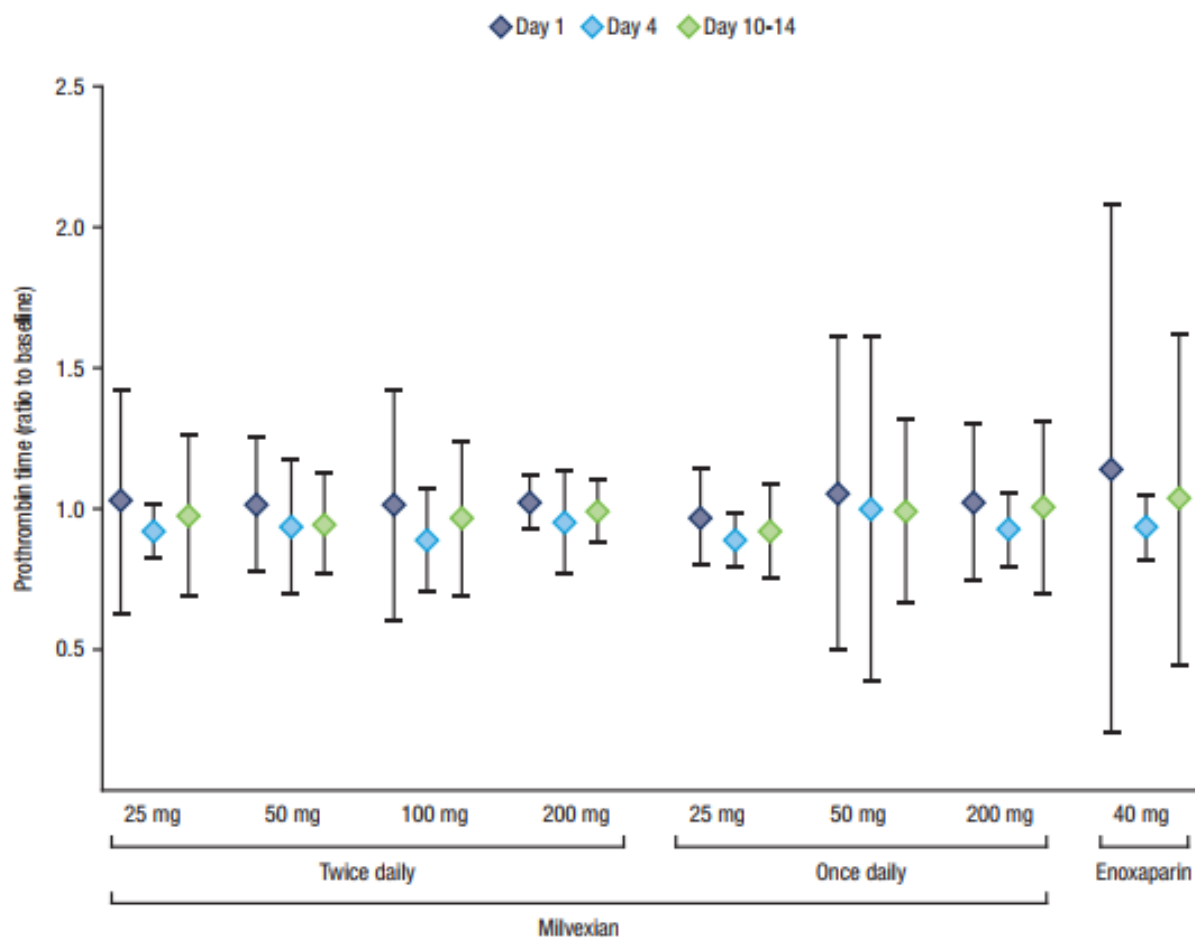

**Table S2 Adverse Events by System Organ Class with milvexian and Enoxaparin**

|                                                   | <b>Milvexian</b> | <b>Enoxaparin</b> |
|---------------------------------------------------|------------------|-------------------|
| Safety population – no.                           | 923              | 296               |
| Adverse events – no. (%)                          | 358 (39)         | 113 (38)          |
| System Organ Class                                |                  |                   |
| Gastrointestinal                                  | 91 (10)          | 26 (9)            |
| Investigations                                    | 76 (8)           | 25 (8)            |
| Skin and subcutaneous tissue                      | 55 (6)           | 16 (5)            |
| Injury, poisoning and procedural complications    | 51 (6)           | 26 (9)            |
| General disorders, administration site conditions | 50 (5)           | 10 (3)            |
| Vascular                                          | 37 (4)           | 5 (2)             |
| Musculoskeletal and connective tissue             | 31 (3)           | 6 (2)             |
| Psychiatric                                       | 29 (3)           | 4 (1)             |
| Nervous system                                    | 28 (3)           | 8 (3)             |
| Infections and infestations                       | 20 (2)           | 12 (4)            |
| Metabolism and nutrition                          | 18 (2)           | 8 (3)             |
| Blood and lymphatic system                        | 17 (2)           | 5 (2)             |
| Respiratory, thoracic and mediastinal             | 12 (1)           | 3 (1)             |
| Renal and urinary                                 | 11 (1)           | 1 (0.3)           |
| Hepatobiliary                                     | 8 (1)            | 2 (1)             |
| Cardiac                                           | 6 (1)            | 2 (1)             |
| Eye                                               | 6 (1)            | 0                 |
| Ear and labyrinth                                 | 4 (0.4)          | 0                 |
| Immune system                                     | 2 (0.2)          | 2 (1)             |
| Surgical and medical procedures                   | 1 (0.1)          | 0                 |

**Table S3 Serious adverse events with milvexian and enoxaparin**

|                                         | <b>Milvexian</b> | <b>Enoxaparin</b> |
|-----------------------------------------|------------------|-------------------|
| Safety population - no.                 | 923              | 296               |
| No. with serious adverse event- no. (%) | 22 (2)           | 11 (4)            |
| Pulmonary embolism                      | 2 (0.2)          | 1 (0.3)           |
| Deep-vein thrombosis                    | 7* (0.8)         | 0                 |
| Suspected pulmonary embolism            | 2† (0.2)         | 0                 |
| Suspected deep-vein thrombosis          | 0                | 1** (0.3)         |
| Ischemic stroke                         | 1 (0.1)          | 0                 |
| Femoral artery embolism                 | 1 (0.1)          | 0                 |
| Coronavirus 2019 infection              | 0                | 2 (0.7)           |
| Hyponatremia                            | 0                | 2 (0.7)           |
| Atrial fibrillation                     | 1 (0.1)          | 0                 |
| Subdural hematoma                       | 0                | 1‡ (0.3)          |
| Hematoma                                | 1¥ (0.1)         | 1¥ (0.3)          |
| Suicide                                 | 0                | 1 (0.3)           |
| Periprosthetic fracture                 | 1 (0.1)          | 0                 |
| Severe knee pain                        | 1 (0.1)          | 0                 |
| Urosepsis                               | 1 (0.1)          | 0                 |
| Wound infection                         | 1 (0.1)          | 1 (0.3)           |
| Respiratory failure                     | 0                | 1 (0.3)           |
| Anemia                                  | 2¶ (0.2)         | 0                 |
| Prolonged vomiting                      | 1 (0.1)          | 0                 |

\*Asymptomatic deep-vein thrombosis was detected by venography; these were reported as serious adverse event because hospitalization was prolonged.

\*\* Deep-vein thrombosis was suspected but was not confirmed by objective testing.

† Pulmonary embolism was suspected but was not confirmed by objective testing.

‡ Subdural hematoma was adjudicated as a major bleed.

¥ Hematomas were adjudicated as clinically relevant nonmajor bleeds..

¶ Anemia without evidence of overt bleeding.
